# Supplementary material for: SCAMP3 Regulates EGFR and Promotes Proliferation and Migration of Triple-Negative Breast Cancer Cells through the Modulation of AKT, ERK, and STAT3 Signaling Pathways
Source: MDPI journal article supplement (doi:10.3390/cancers14112807), 2022-06-05

**Figure S2. Full Western blot images.**  
**Western Blotting in Bands in Figure 1**

**MDA-MB-231**

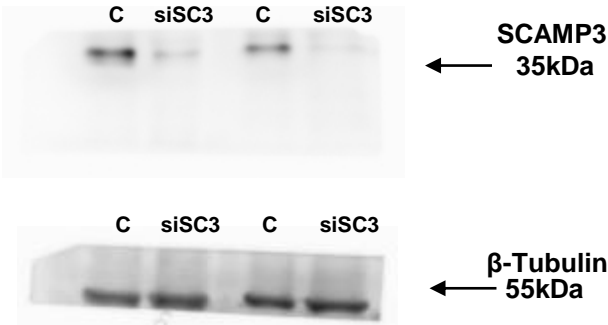

**MDA-MB-468**

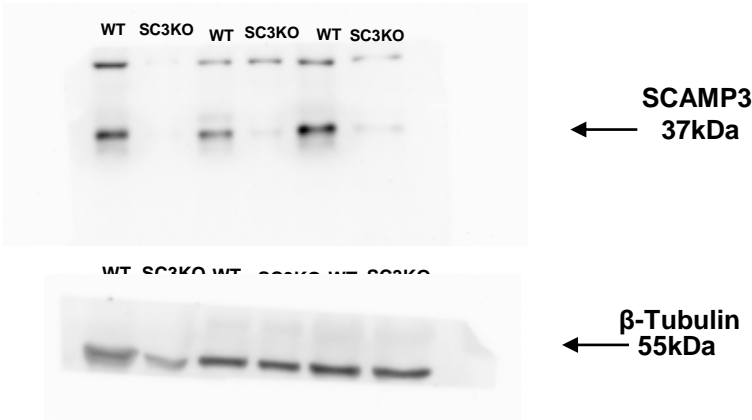

**SUM-149**

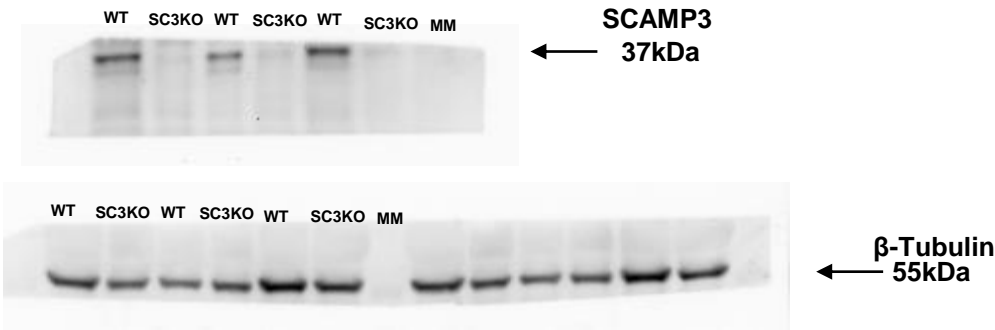

**MCF10A**

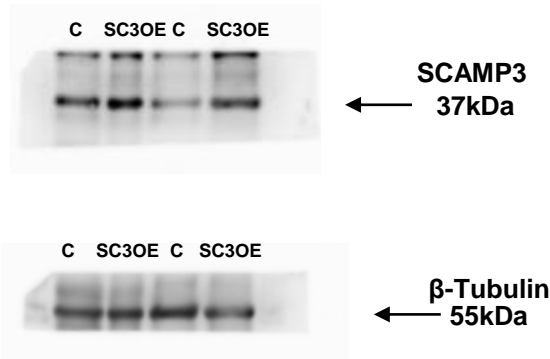

Western Blotting in Bands in Figure 2A

MDA-MB-231

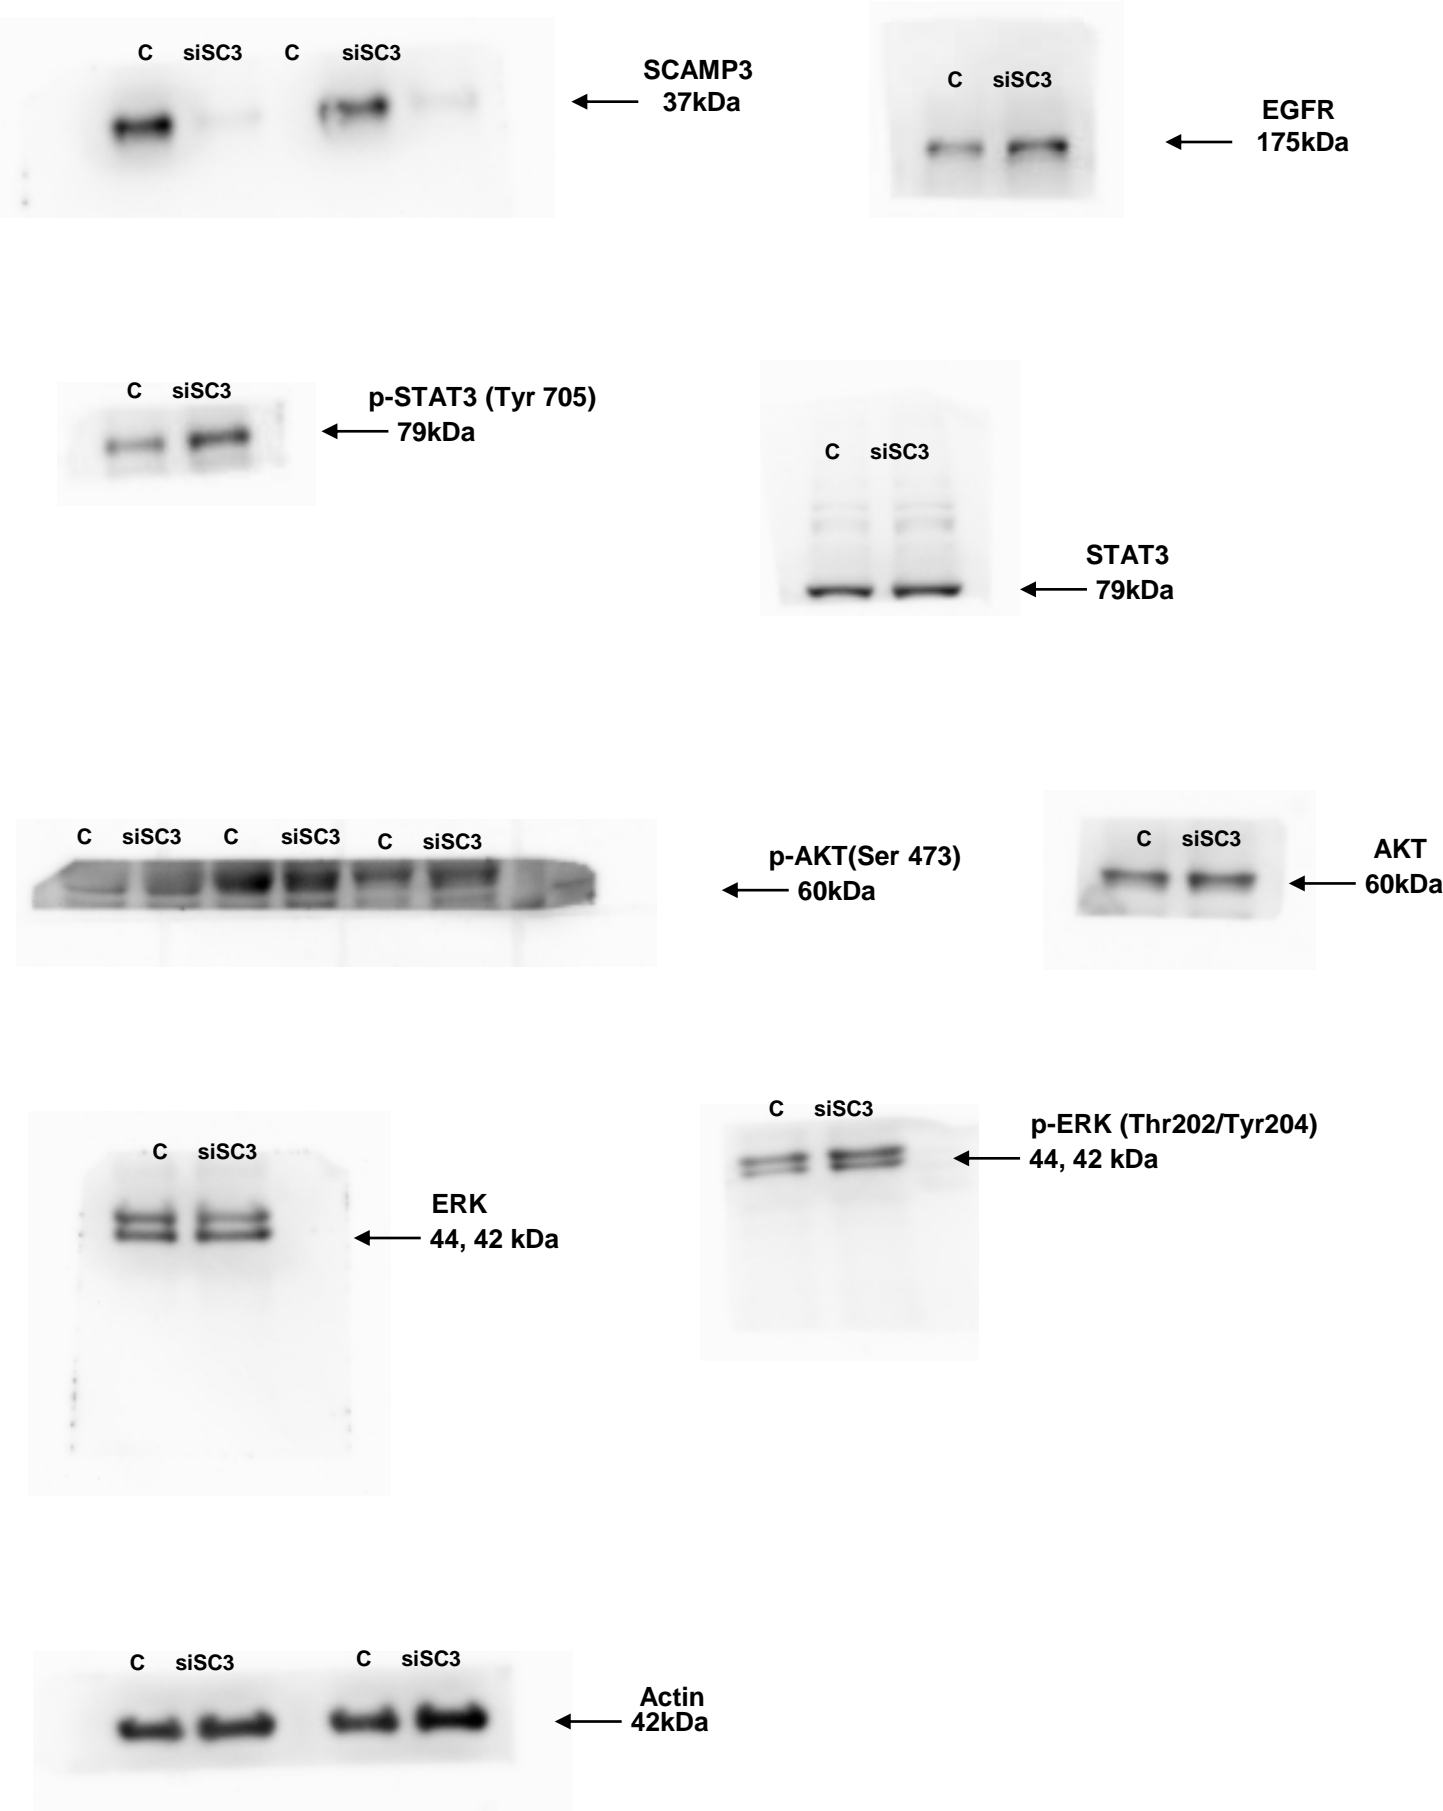

Western Blotting in Bands in Figure 2B

MDA-MB-468

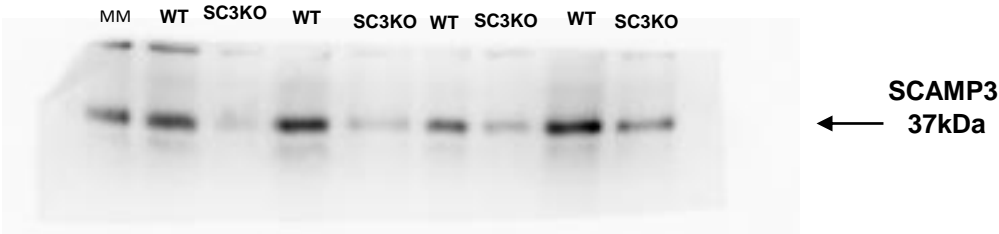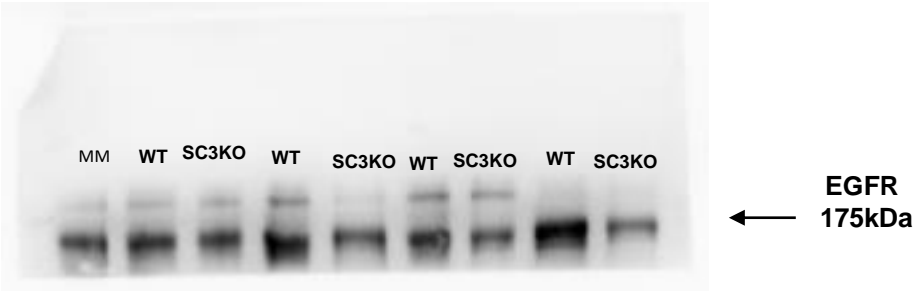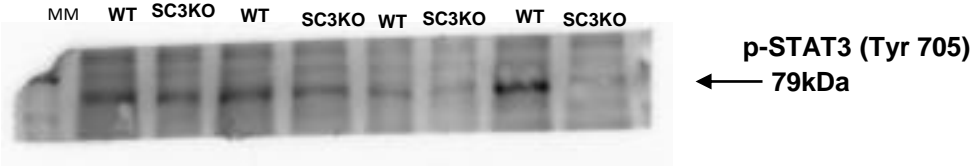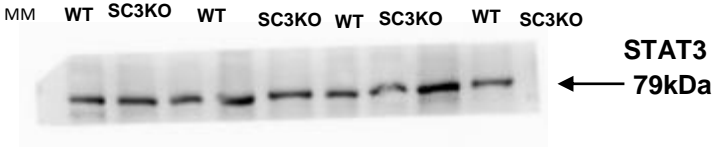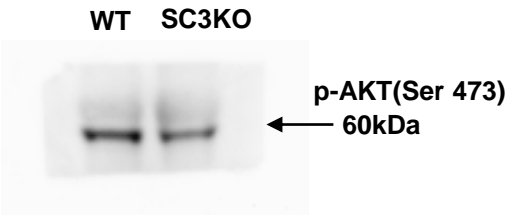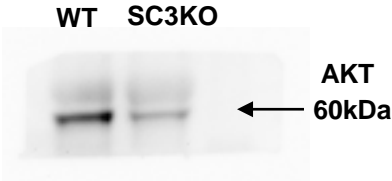

### Western Blotting in Bands in Figure 2B

**MDA-MB-468**

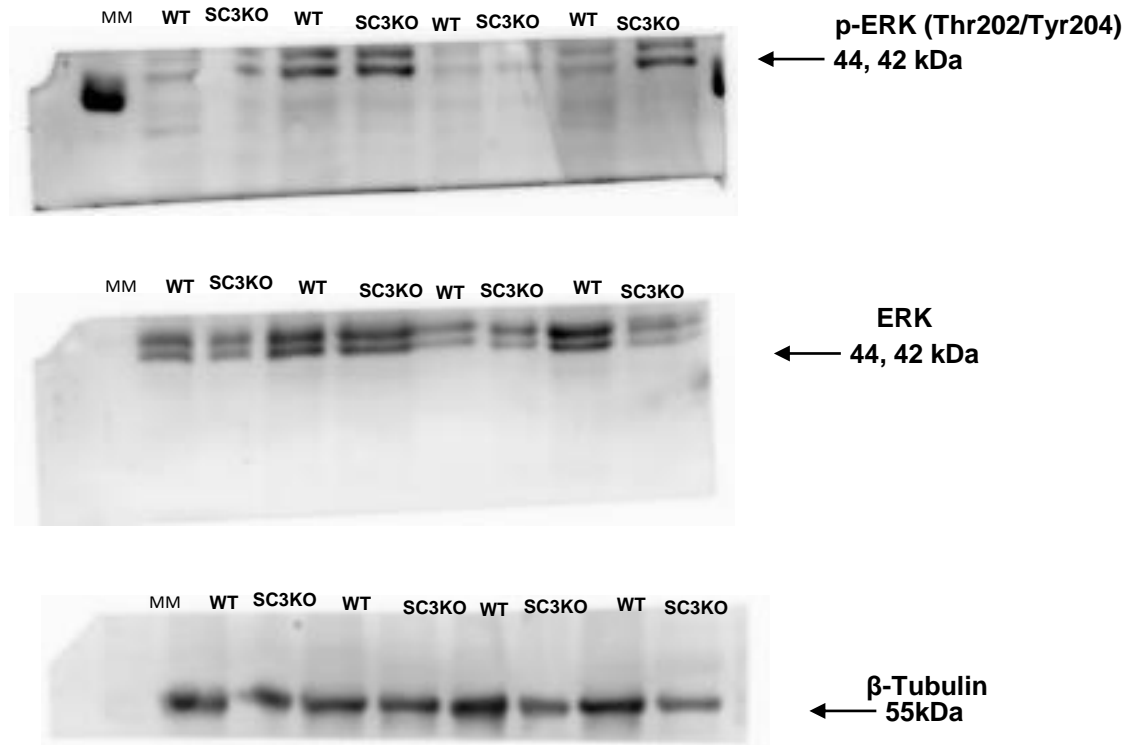

# Western Blotting in Bands in Figure 2C

MCF10-A

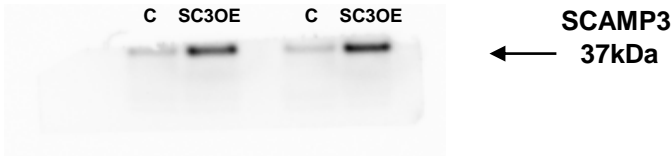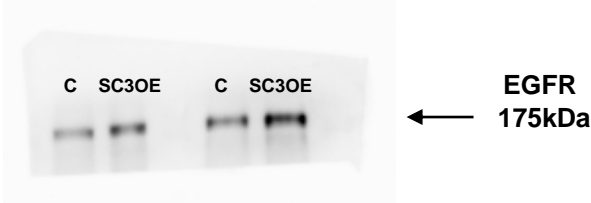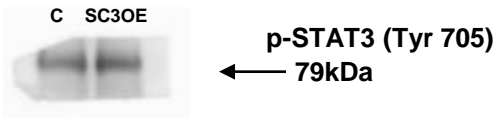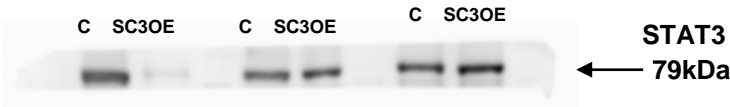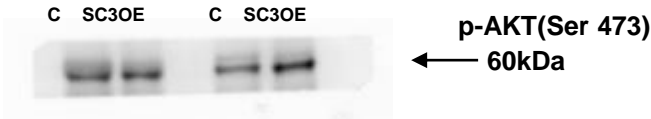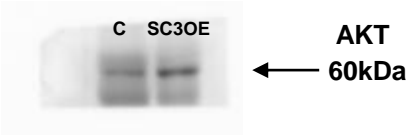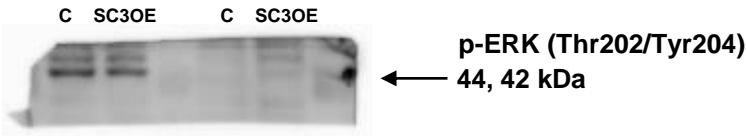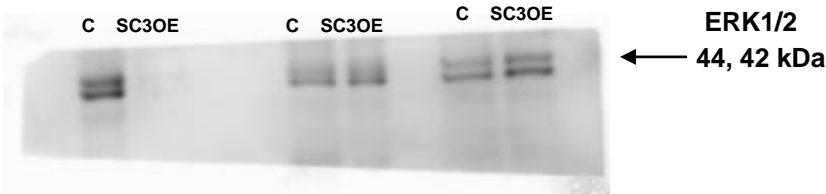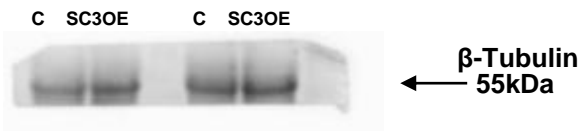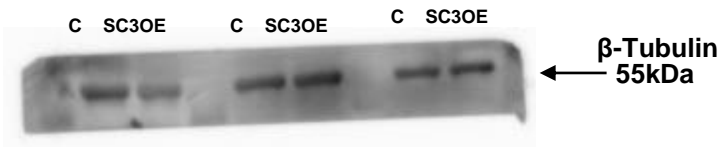

Western Blotting in Bands in Figure 5

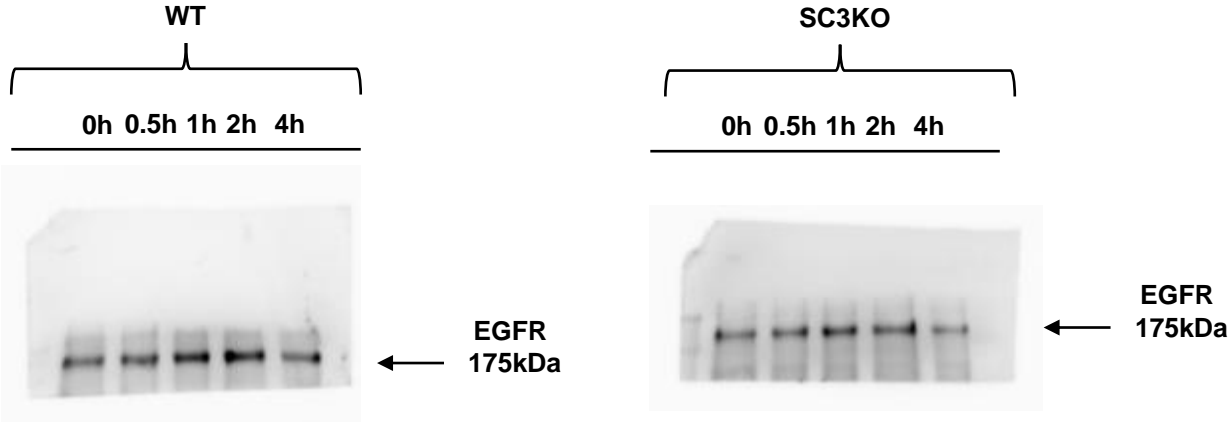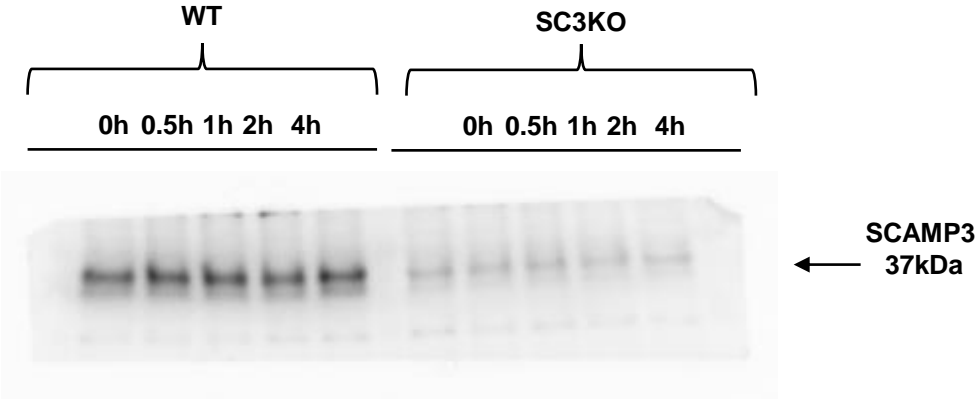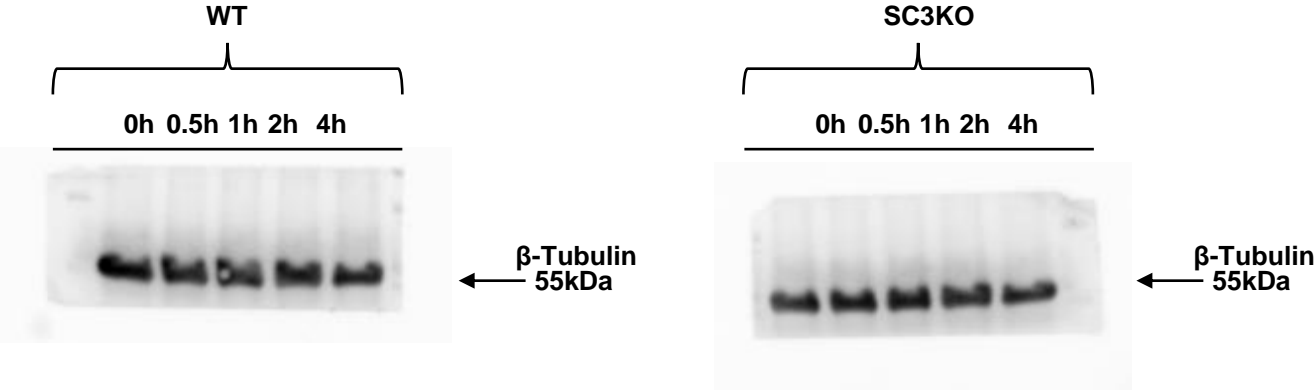

Western Blotting in Bands in Figure 5

SUM-149

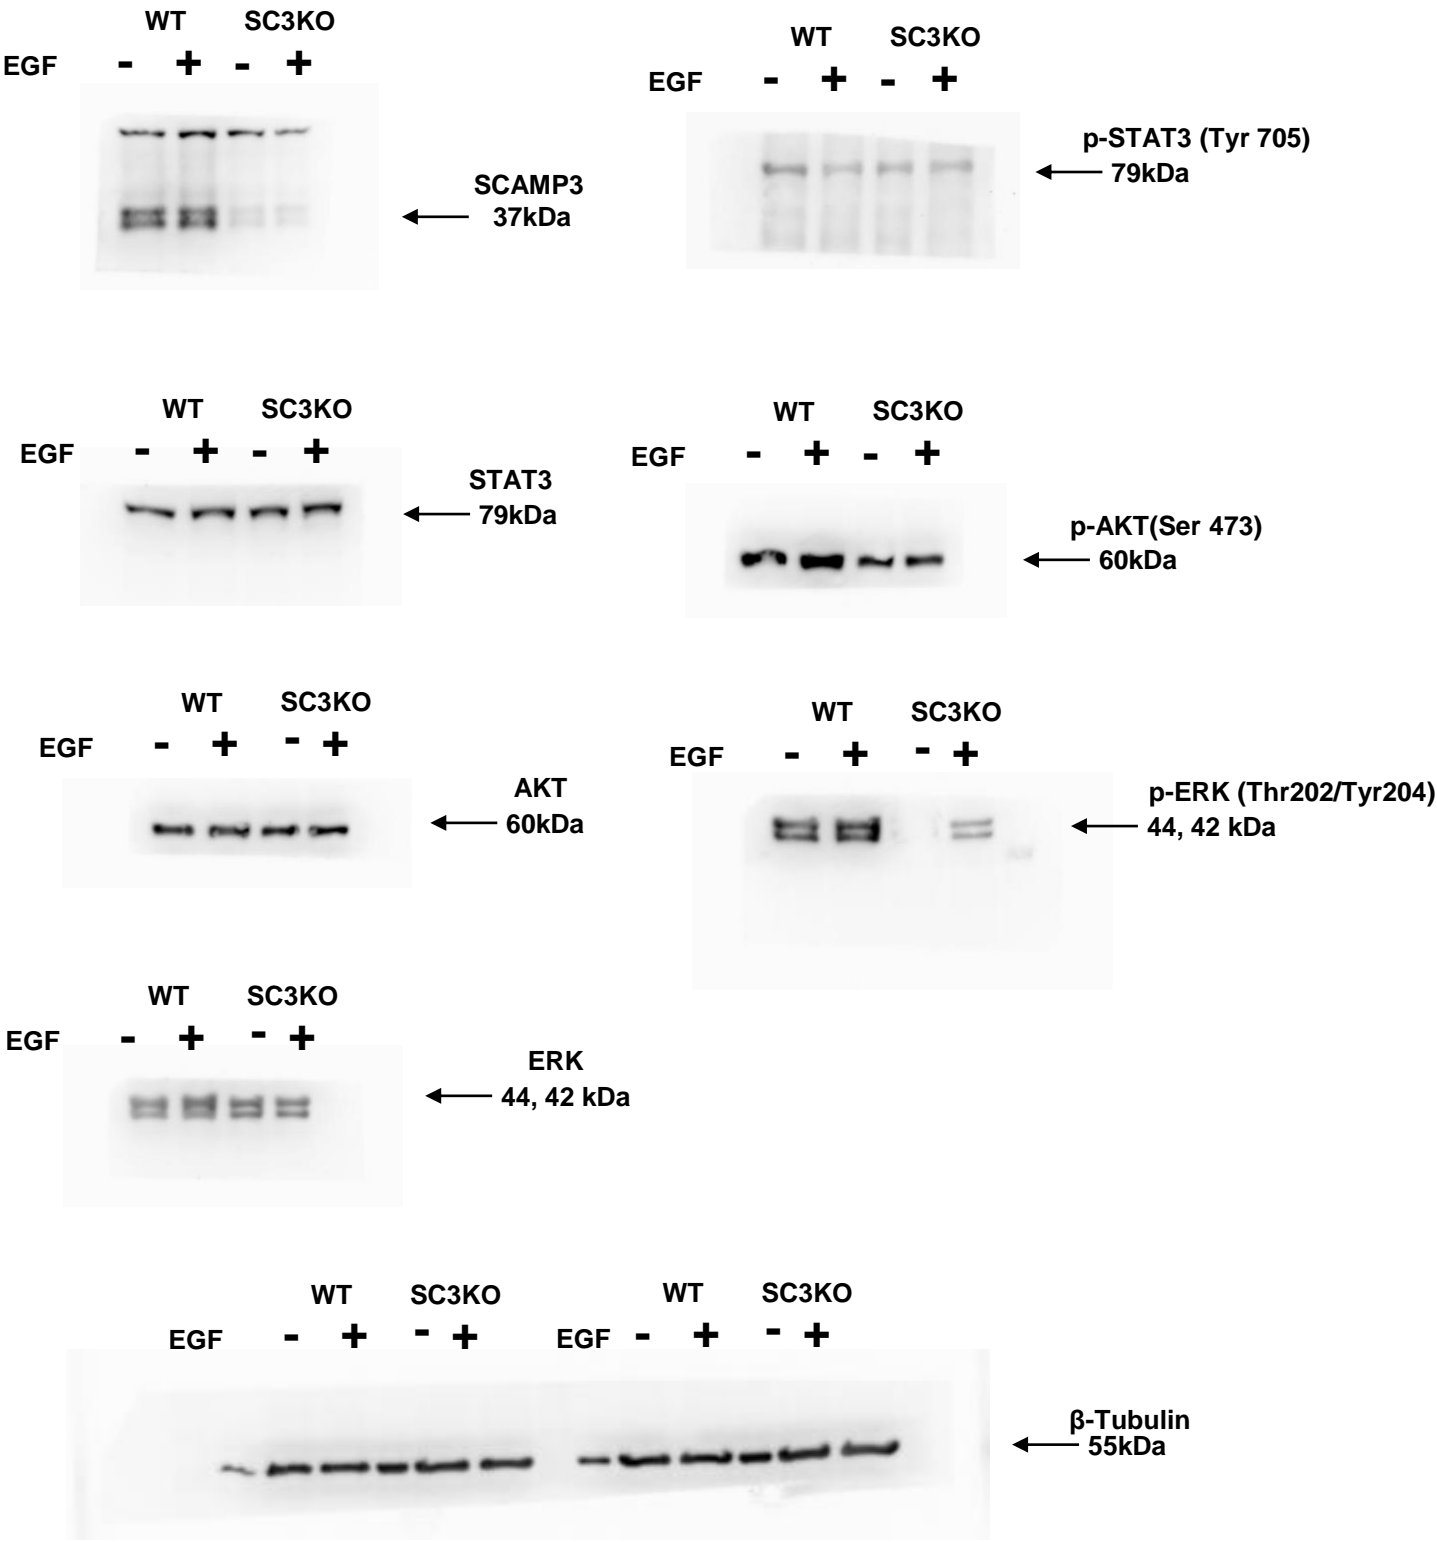

Western Blotting in Bands in Figure 6

Tumors

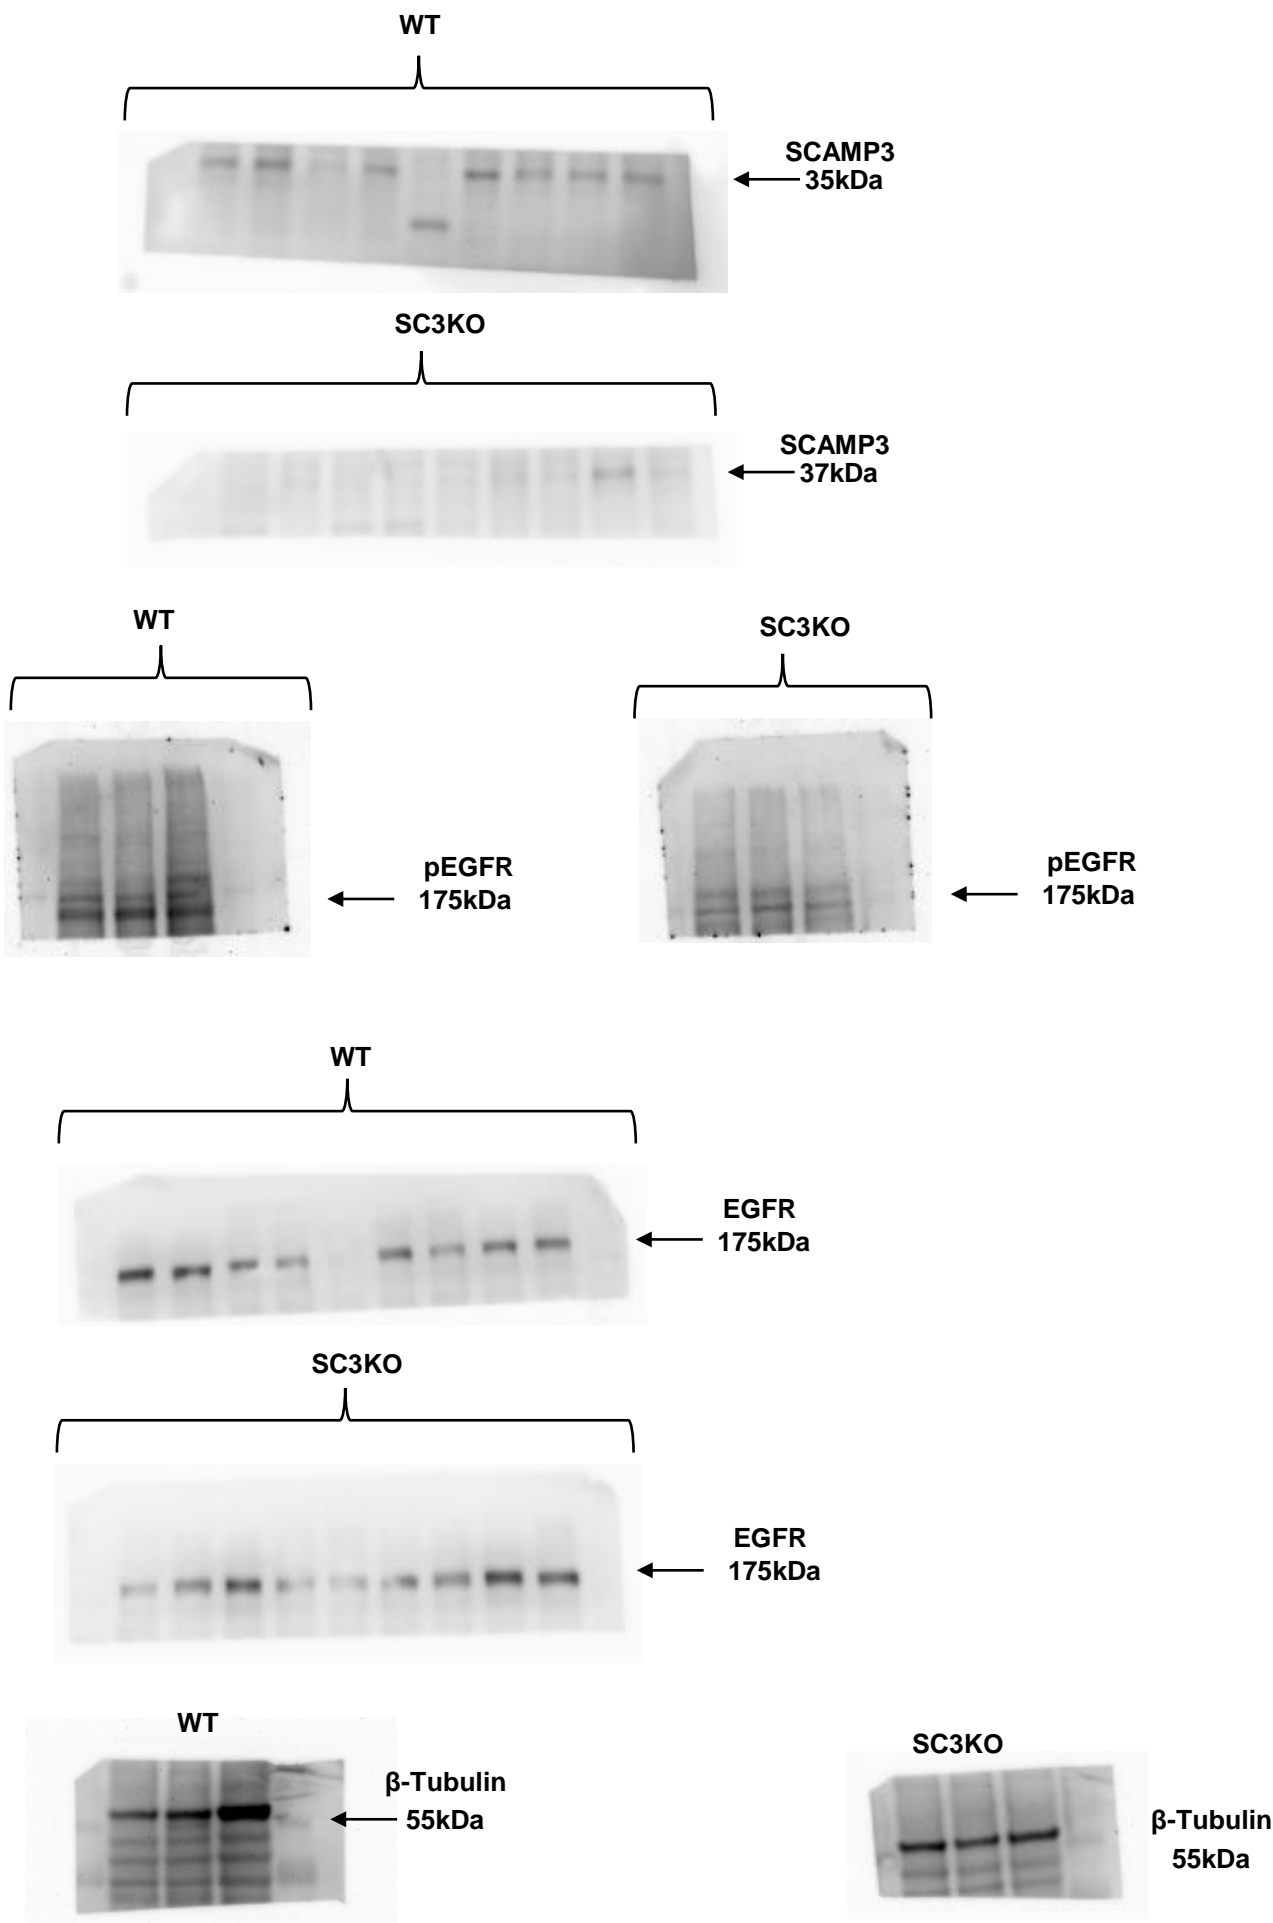

Western Blotting in Bands in Figure 6

Tumors

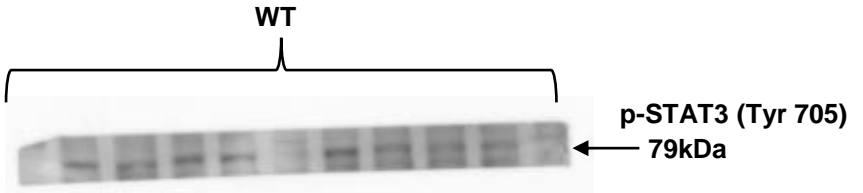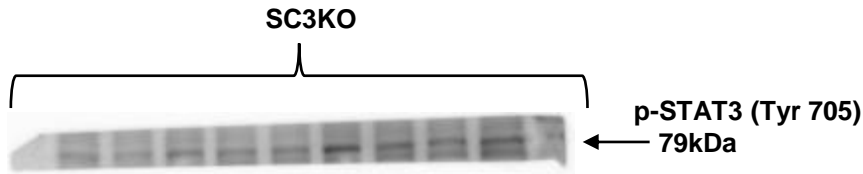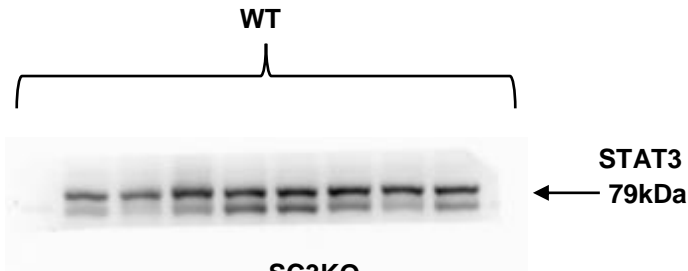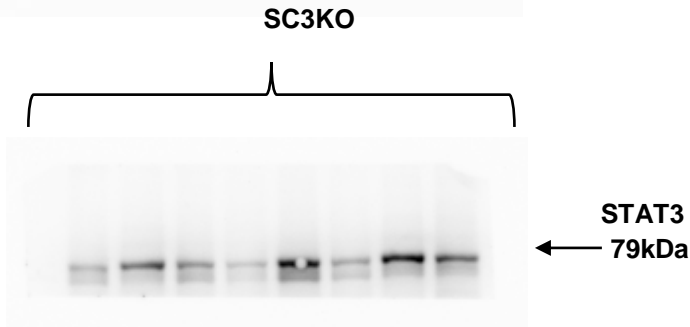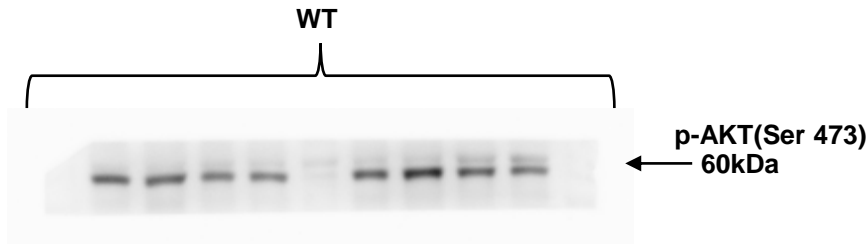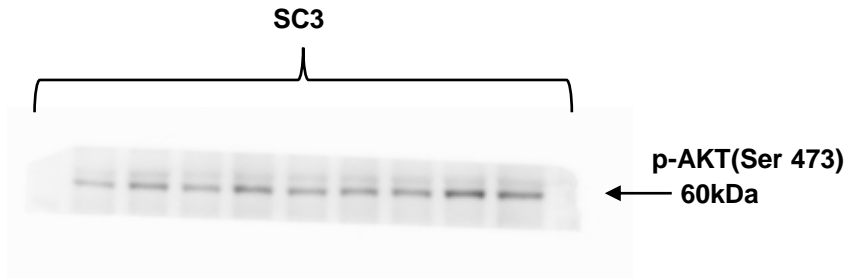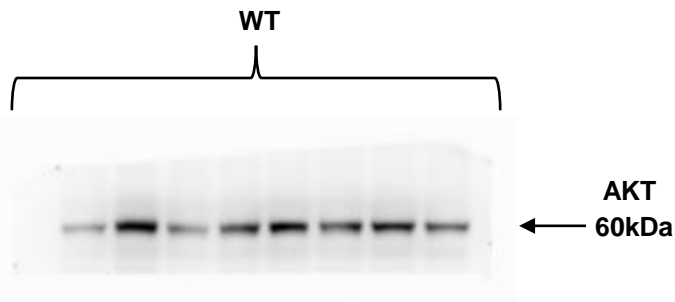

Western Blotting in Bands in Figure 6

Tumors

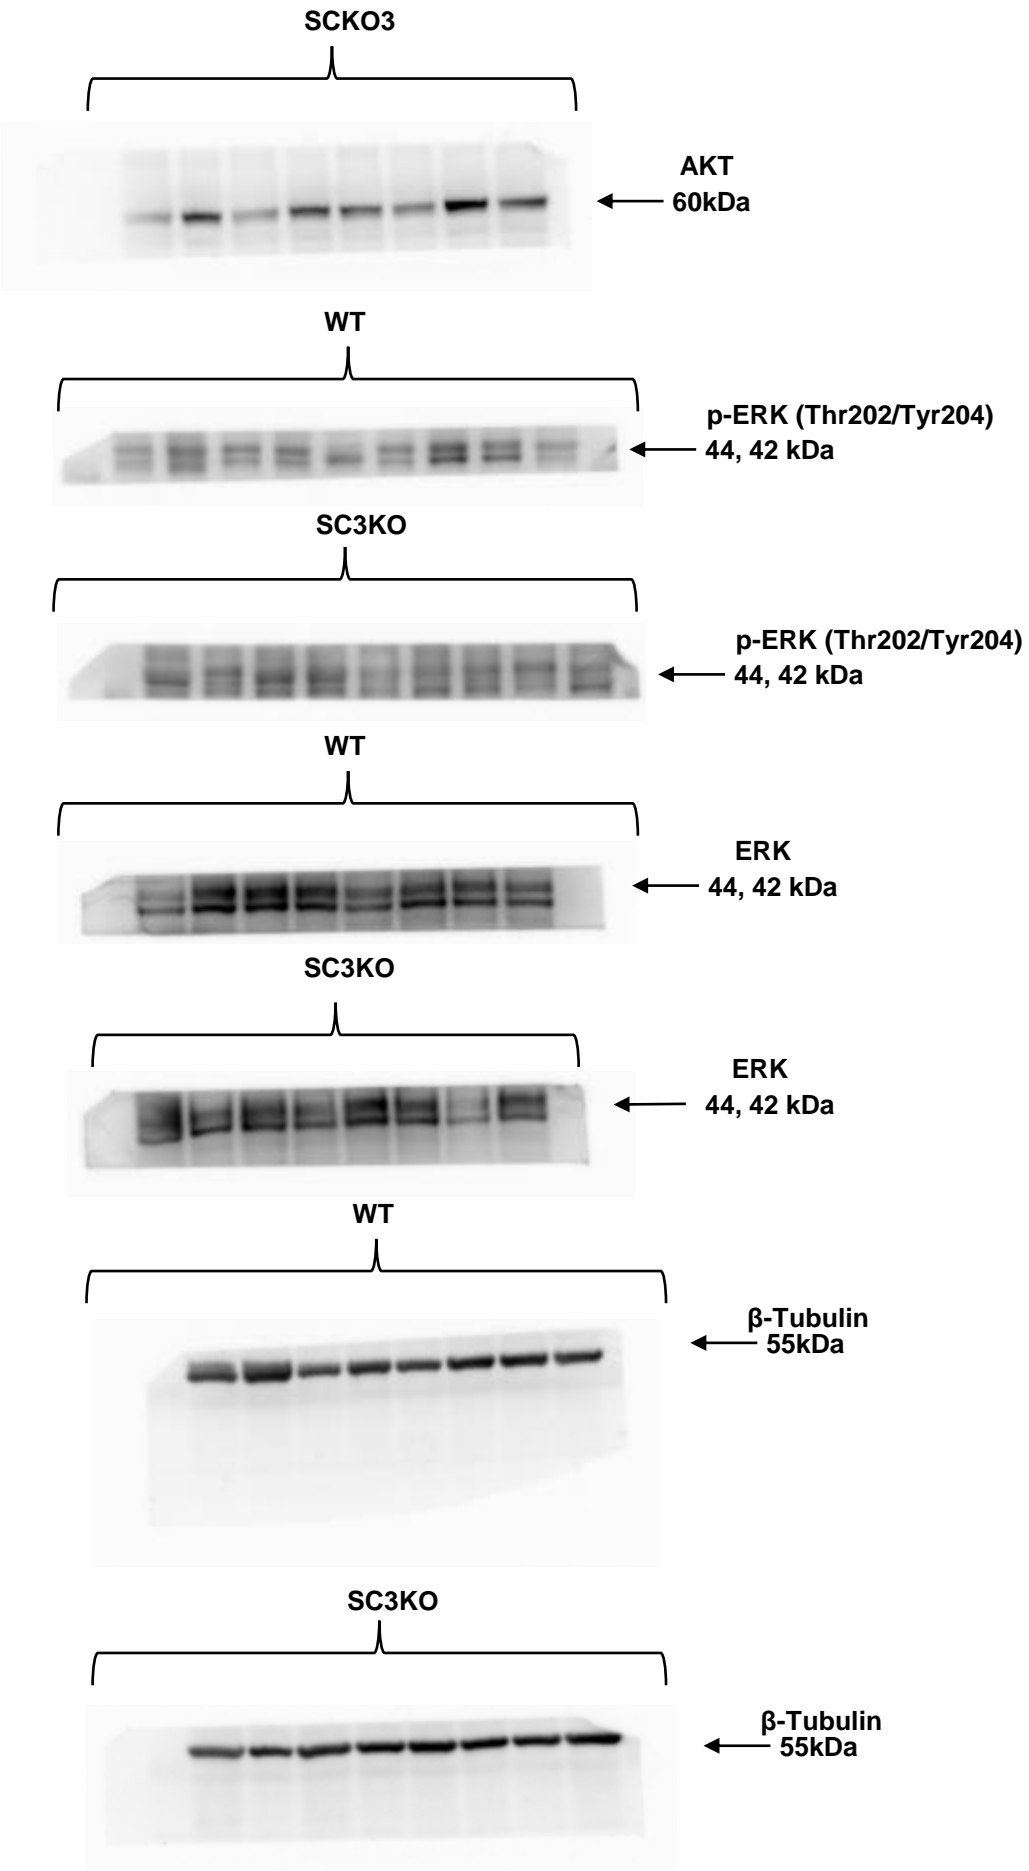

Supplement: s1 [file s1]
