# Supplementary material for: SCAMP3 Regulates EGFR and Promotes Proliferation and Migration of Triple-Negative Breast Cancer Cells through the Modulation of AKT, ERK, and STAT3 Signaling Pathways
Source: MDPI journal article supplement (doi:10.3390/cancers14112807), 2022-06-05
Supplement: s1 [file s1]

**Table S1.** *In vitro* effects of depletion of SCAMP3 on the expression of EGF/PDGF signaling pathway genes.

| Symbol        | Name                                                          | Fold Change* | p-value* |
|---------------|---------------------------------------------------------------|--------------|----------|
| <i>AKT2</i>   | V-akt murine thymoma viral oncogene homolog 2                 | -3.6         | 0.006    |
| <i>BCAR1</i>  | Breast cancer anti-estrogen resistance 1                      | -1.6         | 0.02     |
| <i>BCL2</i>   | B-cell CLL/lymphoma 2                                         | 2.0          | 0.009    |
| <i>BRAF</i>   | V-raf murine sarcoma viral oncogene homolog B1                | -2.0         | 0.002    |
| <i>CASP3</i>  | Caspase 3, apoptosis-related cysteine peptidase               | -2.8         | 0.009    |
| <i>DUSP6</i>  | Dual specificity phosphatase 6                                | -1.6         | 0.05     |
| <i>EGR1</i>   | Early growth response 1                                       | 2.2          | 0.04     |
| <i>EPS8</i>   | Epidermal growth factor receptor pathway substrate 8          | -2.6         | 0.007    |
| <i>GSK3A</i>  | Glycogen synthase kinase 3 alpha                              | -3.2         | 0.01     |
| <i>MAP2K1</i> | Mitogen-activated protein kinase kinase 1                     | -2.2         | 0.006    |
| <i>MAPK10</i> | Mitogen-activated protein kinase 10                           | 4.6          | 0.0002   |
| <i>PDGFB</i>  | Platelet-derived growth factor beta polypeptide               | -3.2         | 0.04     |
| <i>PRKCA</i>  | Protein kinase C, alpha                                       | -1.6         | 0.03     |
| <i>RASA1</i>  | RAS p21 protein activator (GTPase activating protein) 1       | -1.7         | 0.04     |
| <i>SHC1</i>   | SHC (Src homology 2 domain containing) transforming protein 1 | -3.0         | 0.05     |
| <i>STAT5A</i> | Signal transducer and activator of transcription 5A           | -3.6         | 0.02     |

\* Table shows genes up- and down-regulated  $\geq 1.5$ -fold change and  $p \leq 0.05$ .
