# Supplementary material for: SCAMP3 Regulates EGFR and Promotes Proliferation and Migration of Triple-Negative Breast Cancer Cells through the Modulation of AKT, ERK, and STAT3 Signaling Pathways
Source: MDPI journal article supplement (doi:10.3390/cancers14112807), 2022-06-05
Supplement: s1 [file s1]

(A)

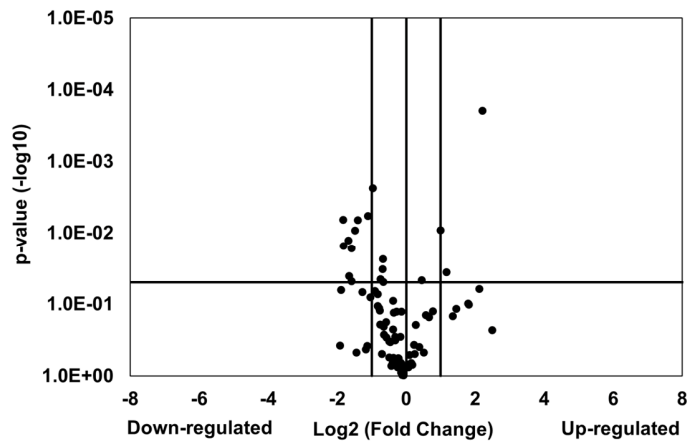

(B)

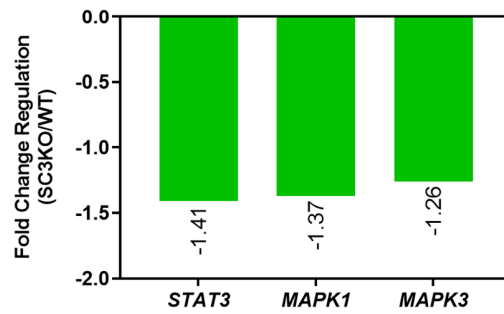

**Figure S1.** SCAMP3 regulates gene expression of EGFR and PDGF pathways. RT<sup>2</sup> PCR arrays to profile the expression of EGF/ PDGF Signaling Pathway specific genes were performed to three different samples from SUM-149 WT and SC3KO cells. ACTB, B2M, GAPDH, HPRT1 and RPLP0 were used as reference genes. (A) Volcano plot shows the effects on gene expression analyzed at  $-2.0 \geq 2.0$  log<sub>2</sub>-fold change (vertical lines). Statistically significant ( $p < 0.05$ ) regulated genes are above the horizontal black line. (B) Gene expression of *STAT3*, ( $p = 0.06$ ), *MAPK1* ( $p = 0.08$ ) and *MAPK3* ( $p = 0.03$ ).
